# Supplementary material for: Design of a robotic zebra finch for experimental studies on developmental song learning
Source: Oxford University Press journal article supplement (doi:10.1242/jeb.242949), 2022-01-20
Supplement: jeb242949supp.pdf [file jeb242949supp.pdf]

**Table S1.** Ethogram used for behavioural analysis during exposure of young finches to MANDABOT.

| <b>Behaviour</b>                      | <b>Description</b>                                                                                              |
|---------------------------------------|-----------------------------------------------------------------------------------------------------------------|
| Platform                              | Moving, lying down or standing on the platform for less than 10 s                                               |
| Close vicinity                        | Lying down or standing on the platform for more than 10 s                                                       |
| Clumping                              | Bodily contact between the pupil and the robot, flank to flank (Sparks, 1964) for more than 10 s                |
| Preening                              | The pupil turns his head to groom his feathers, his beak is hidden then put back his head in a neutral position |
| Sleeping                              | Pupil's eyes are closed and his head is under his wing                                                          |
| Pecking on the:                       |                                                                                                                 |
| Beak                                  | Robot's beak                                                                                                    |
| Head                                  | Robot's head                                                                                                    |
| Body                                  | Robot's neck, flanks and legs                                                                                   |
| Tail                                  | Robot's tail                                                                                                    |
| Substrate                             | Platform, perches and cage bars                                                                                 |
| Pupil's reactions to the robot' song: |                                                                                                                 |
| Stays still                           | Pupil stays still                                                                                               |
| Stands up                             | Pupil stands up                                                                                                 |
| Moves                                 | Pupil moves on the platform                                                                                     |
| Flies away and orientated             | Pupil leaves the platform and orients his body and his head in the direction of the robot                       |
| Flies away                            | Pupil leaves the platform and does not orient himself in in the direction of the robot                          |

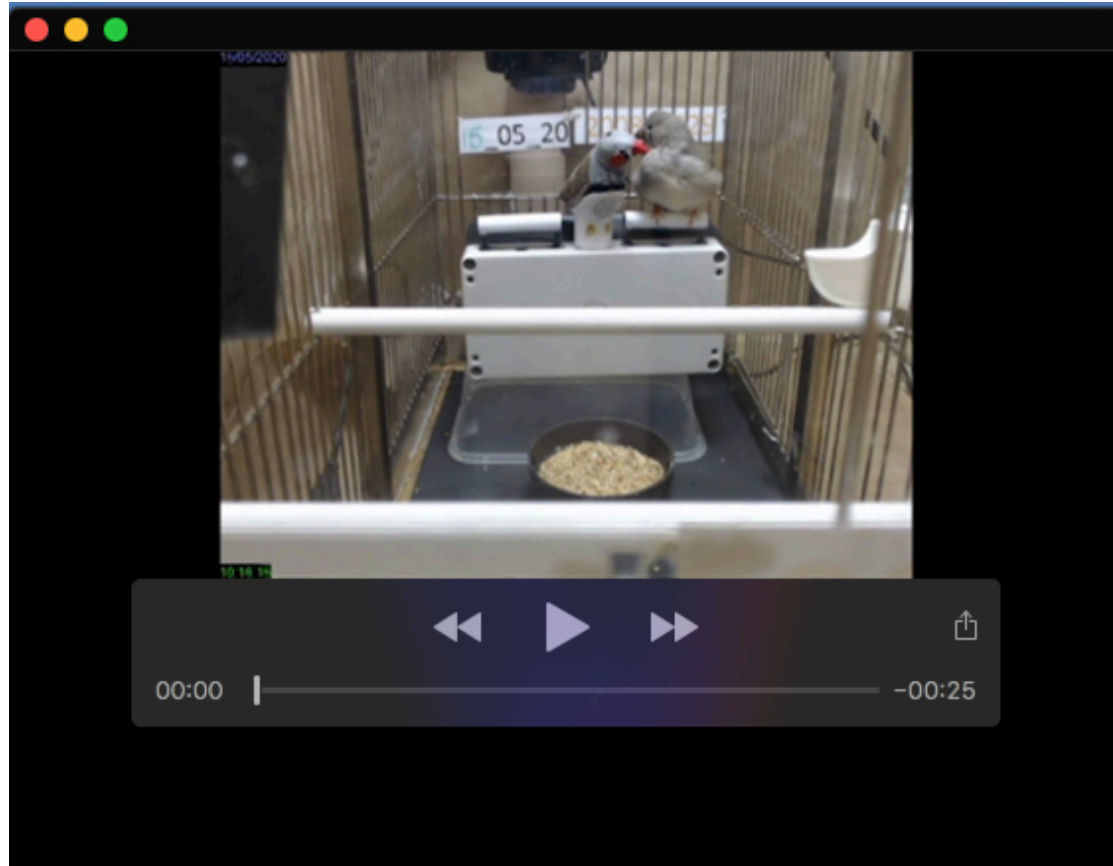

**Movie 1.** Behaviour of pupils towards the zebra finch robot.
